# Supplementary material for: Student perceptions toward virtual reality training in dental implant education
Source: PeerJ. 2023 May 5;11:e14857. doi: 10.7717/peerj.14857 (PMC10166074; doi:10.7717/peerj.14857)
Supplement: Data S1 [file peerj-11-14857-s001.xlsx]

## Sheet: survey-1
A SUS questionnaire to measure the user experience in using VR system
We sincerely thank you for taking part in this survey on evaluating the participants’ experience in implementing virtual reality (VR) system and equipment. The results will provide useful information to improve the learning outcome of dental education by means of utilizing VR as teaching resource. The survey adopted the “system usability scale (SUS) – it provides a reliable tool for measuring the…
1. I think that I would like to use the VR system frequently. [single choice] *
○1	○2	○3	○4	○5
2. I found the VR system unnecessarily complex. [single choice] *
○1	○2	○3	○4	○5
3. I thought the VR system was easy to use. [single choice] *
○1	○2	○3	○4	○5
4. I think that I would need the support of a technical person to be able to use the VR system. [single choice] *
○1	○2	○3	○4	○5
5. I found the various functions in the VR system were well integrated. [single choice] *
○1	○2	○3	○4	○5
6. I thought there was too much inconsistency in the VR system. [single choice] *
○1	○2	○3	○4	○5
7. I would imagine that most people would learn to use the VR system very quickly. [single choice] *
○1	○2	○3	○4	○5
8. I found the VR system very cumbersome to use. [single choice] *
○1	○2	○3	○4	○5
9. I felt very confident using the VR system. [single choice] *
○1	○2	○3	○4	○5
10. I needed to learn a lot of things before I could get going with the VR system. [single choice] *
○1	○2	○3	○4	○5

## Sheet: 1. mean and sd (Table 1)
4	3	3	4	5	2	5	3	3	1		82.5
5	1	4	4	5	1	5	1	5	5		90
3	2	2	4	3	2	4	2	3	4		72.5
4	2	4	3	3	2	4	1	5	3		77.5
2	4	3	3	2	4	2	4	3	2		72.5
5	3	5	2	5	3	5	2	3	2		87.5
5	1	3	5	3	2	4	2	3	5		82.5
4	1	4	2	4	1	4	1	4	1		65
4	2	4	2	3	3	3	2	4	3		75
5	5	5	5	5	5	5	5	5	5		125
3	3	3	3	4	3	4	3	4	5		87.5
1	4	1	1	2	3	2	3	2	3		55
4	3	4	4	4	2	4	2	3	2		80
3	2	3	3	3	2	4	2	2	5		72.5
5	3	5	2	5	2	4	1	5	4		90
5	2	3	4	3	2	3	2	2	3		72.5
1	2	3	4	3	4	3	4	4	3		77.5
5	2	3	4	5	2	5	2	5	2		87.5
3	2	4	4	3	4	3	3	4	4		85
5	1	5	5	4	1	5	3	5	5		97.5
4	3	4	3	4	3	5	3	5	4		95
4	2	4	1	3	2	4	2	4	3		72.5
5	3	5	4	5	3	5	3	5	3		102.5
4	3	3	4	4	3	4	3	3	4		87.5
5	3	4	3	4	3	4	3	4	5		95
5	5	5	3	4	2	4	1	5	5		97.5
1	3	2	4	4	2	4	2	3	3		70
4	3	3	4	3	3	5	2	3	3		82.5
4	3	3	4	3	3	3	3	3	4		82.5
4	2	3	3	3	3	3	2	3	3		72.5
5	4	5	5	4	2	4	4	3	4		100
5	1	5	5	5	1	5	1	5	5		95
4	3	3	4	3	3	5	4	3	5		92.5
5	2	3	5	4	2	4	3	2	3		82.5
5	2	4	4	4	2	5	2	2	4		85
4	3	3	2	3	2	3	1	4	2		67.5
5	1	4	3	4	2	3	2	3	4		77.5
4	4	4	2	3	4	5	1	4	5		90
4	2	3	3	4	2	4	2	3	5		80
3	1	2	5	4	3	1	3	1	5		70
5	3	4	3	4	2	4	2	3	4		85
4	1	5	2	5	2	5	1	5	1		77.5
3	2	5	1	4	2	5	1	4	5		80
3	1	3	3	4	2	5	2	3	3		72.5
5	1	4	4	2	1	2	1	5	2		67.5
5	2	5	2	4	2	4	2	5	2		82.5
3	1	5	3	1	3	5	1	5	5		80
5	4	4	3	5	5	4	2	3	4		97.5
5	1	5	4	4	1	5	2	5	4		90
5	1	4	4	5	2	5	2	5	5		95
5	1	4	3	4	2	4	2	3	3		77.5
4	2	4	4	3	3	4	3	4	5		90
5	2	4	4	4	2	4	2	4	2		82.5
5	1	4	3	4	2	4	1	5	5		85
5	3	5	3	5	3	5	4	5	5		107.5
3	2	3	5	4	3	3	2	2	4		77.5
4	1	4	4	4	2	4	2	4	4		82.5
5	2	3	5	5	1	5	1	5	1		82.5
5	3	4	4	4	2	4	2	2	4		85
3	2	4	4	3	3	3	3	3	5		82.5
4	1	4	3	3	3	4	2	3	2		72.5
3	2	2	5	3	3	3	3	2	3		72.5
4	2	3	4	4	2	5	1	3	4		80
4	2	4	3	3	3	4	2	3	4		80
3	1	4	3	3	1	3	1	3	5		67.5
4	2	4	3	4	2	4	2	3	3		77.5
5	1	3	4	4	1	3	2	4	5		80
4	1	4	3	3	2	5	2	5	3		80
3	3	2	2	3	2	4	2	3	4		70
3	3	3	3	3	3	3	2	4	4		77.5
2	3	1	2	3	2	1	5	1	1		52.5
4	3	3	5	2	4	3	4	3	3		85
4	2	4	5	4	3	3	4	3	3		87.5
5	2	4	3	4	2	5	2	2	5		85
2	1	5	4	2	2	5	2	4	2		72.5
4	5	4	3	5	4	5	5	4	3		105
3	4	5	4	3	4	5	4	3	3		95
5	2	5	4	5	2	5	2	4	2		90
4	2	3	4	2	3	3	3	3	4		77.5
5	1	4	3	4	1	5	1	5	2		77.5
3	2	3	4	3	3	4	3	3	4		80
2	3	4	3	2	4	4	3	4	2		77.5
5	1	5	3	3	2	5	1	4	4		82.5
4	2	4	4	4	3	4	2	3	4		85
3	3	4	3	2	3	5	3	3	2		77.5
3	2	4	4	3	3	3	2	3	5		80
4	2	3	4	3	2	4	2	3	2		72.5
2	4	2	3	3	4	2	3	3	2		70
4	2	5	5	4	2	5	4	4	2		92.5
2	3	4	3	3	4	4	2	3	4		80
5	2	4	4	4	2	3	2	4	4		85
3	1	4	4	4	1	4	2	4	4		77.5
5	3	4	5	4	1	3	2	4	5		90
3	4	3	4	3	2	3	2	3	3		75
3	1	3	4	4	2	4	1	3	2		67.5
																	Descriptive Statistics
											82	10.7906						N	Mean	Std. Deviation	Skewness
																		Statistic	Statistic	Statistic	Statistic	Std. Error
																	VAR00001	95	3.9263	1.06434	-0.824	0.247
																	VAR00002	95	2.2632	1.04383	0.596	0.247
																	VAR00003	95	3.7158	0.93015	-0.533	0.247
																	VAR00004	95	3.5158	0.977	-0.43	0.247
																	VAR00005	95	3.6105	0.89079	-0.25	0.247
VAR00001	VAR00002	VAR00003	VAR00004	VAR00005	VAR00006	VAR00007	VAR00008	VAR00009	VAR00010								VAR00006	95	2.4421	0.91925	0.51	0.247
95	95	95	95	95	95	95	95	95	95	N	Statistic						VAR00007	95	3.9684	0.96152	-0.816	0.247
3.9263	2.2632	3.7158	3.5158	3.6105	2.4421	3.9684	2.2947	3.5579	3.5053	Mean	Statistic						VAR00008	95	2.2947	0.99866	0.749	0.247
1.06434	1.04383	0.93015	0.977	0.89079	0.91925	0.96152	0.99866	1.00759	1.21929	Std. Deviation	Statistic						VAR00009	95	3.5579	1.00759	-0.098	0.247
-0.824	0.596	-0.533	-0.43	-0.25	0.51	-0.816	0.749	-0.098	-0.336	Skewness	Statistic						VAR00010	95	3.5053	1.21929	-0.336	0.247
0.247	0.247	0.247	0.247	0.247	0.247	0.247	0.247	0.247	0.247		Std. Error						Valid N (listwise)	95

## Sheet: 1. survey-2_preliminary data
number	Time to submit the answer sheet	time spent	source	source details	from IP (the information of the IP address have been deleted from the raw data because of ethical consideration)	1. Your age?	2. Your grade?	3. Your gender?	4. Have you ever used VR equipment before?	5. The VR system is easy to use.	6. I am able to study and master VR training programme even without the support of technical person.	7. I truly perceive the touch and vibration in term of virtual environment during the operation.	8. VR helps me to accurately understand and practise the operation of dental implant surgery clinically.	9. I repeatedly experienced this operation just now.	10. The 30-minute VR training is enough for me to learn the key points in this module.	11. The VR system is conducive to encourage me to study the content of this module.	12. The application of VR system makes learning process fun.	13. VR system makes the learning more efficiently.	14. In regard to learning outcome, I think that VR system is better than the traditional operation in laboratory.	15. Generally, I think that the VR experience is helpful for my study of dental implant.	16. Regarding to the content of this module, I think that the VR system should be combined with the traditionally practical approach.	17. VR system is very suitable for implementing as an complimentary teaching approach in dental practical sessions.	18. From my experience in utilizing VR system today, I think that the VR system appears to be a mature technology and supplies the real-word environment.	19. I think that the traditional practical teaching in dental education would be replaced by VR system in the future.	20. I would like to spend more time studying dental courses using VR system.	21. After experiencing VR system, I expect that VR system is utilized by other scientific disciplines in teaching and learning.	22. In your opinion, what further applications of VR technology in dental education could be expected in the future?	总分
2	2020/12/3 15:09:54	163second	Wechat	N/A		20	4	2	2	6	4	1	3	1	1	1	3	3	5	3	1	1	1	6	6	1	novel, real	30
3	2020/12/3 15:40:36	218second	Wechat	N/A		17	1	2	1	1	2	1	2	1	1	1	1	1	1	1	1	1	1	7	1	1	Stereoscopic, real, and strong operability. It is hoped that the modules for clinical simulation (such as dental implants, surgery) can be increased, and various differences in the simulation process can be pointed out (similar to a game). Looking forward to improving students' interest even more! "	8
4	2020/12/7 17:48:36	942second	Wechat	N/A		19	1	2	1	2	7	1	2	7	7	3	3	3	6	2	2	2	2	7	6	3	overall feeling real	48
5	2020/12/7 18:08:02	1139second	Wechat	N/A		19	1	1	2	2	3	3	4	7	5	4	4	4	8	4	4	4	6	9	5	3	Very interesting, but the authenticity is still lacking, the experimental operation process is too simplified, and it feels a bit unreal	62
6	2020/12/7 18:33:13	848second	Wechat	N/A			1	1	2	8	6	8	8	2	5	8	8	8	6	9	8	8	5	5	6	5	A very good experience, I feel that it will be helpful for learning	96
7	2020/12/7 18:39:16	107second	Wechat	N/A		18	1	1	2	9	1	1	6	6	6	3	4	4	7	6	1	1	3	4	2	1	needs improvement	48
8	2020/12/7 19:13:46	265second	Wechat	N/A		18	1	2	2	3	3	1	6	10	5	1	1	1	1	1	1	1	7	7	3	1	very good	36
9	2020/12/7 19:16:33	80second	Wechat	N/A		18	1	2	2	1	3	1	3	10	6	3	3	3	3	3	1	1	2	3	2	2	Strong sense of reality	33
10	2020/12/7 19:20:26	82second	Wechat	N/A		18	1	1	1	3	2	2	4	4	2	2	2	2	6	4	2	4	6	6	4	2	still needs to be improved	40
11	2020/12/7 19:29:55	70second	Wechat	N/A		18	1	2	2	10	10	10	10	10	10	10	10	10	10	10	10	10	10	10	10	10	Experience the real worth promoting	153
12	2020/12/7 19:32:07	62second	Wechat	N/A		18	1	2	2	1	1	1	1	1	1	1	1	1	1	1	1	1	1	1	1	1	The experience is real and worth promoting	0
13	2020/12/7 19:46:40	814second	Wechat	N/A		18	1	1	2	5	6	3	5	4	4	4	4	4	4	4	3	4	2	8	4	2	The accuracy of the surgical site is not enough, others are good	53
14	2020/12/7 19:47:35	155second	Wechat	N/A		19	1	2	1	9	10	10	9	8	9	9	10	10	6	8	9	9	10	5	7	7	I think it is very easy for us to be exposed to the real scenes in the treatment process, improve our interest in learning, and let us experience the treatment process earlier	128
15	2020/12/7 20:07:37	292second	Wechat	N/A		17	1	2	2	3	7	3	5	8	3	3	4	5	4	5	4	4	4	7	5	3	realism, focus	60
16	2020/12/7 20:13:58	168second	Wechat	N/A		18	1	2	2	1	6	3	3	10	4	1	1	2	6	3	1	2	3	9	5	2	Interesting, but a little fuzzy	45
17	2020/12/7 20:19:54	55second	Wechat	N/A		18	1	2	1	1	1	1	1	1	1	1	1	1	1	1	1	1	1	1	1	1	great	0
18	2020/12/7 20:41:26	222second	Wechat	N/A		18	1	2	1	3	6	4	4	4	7	2	1	2	2	2	1	1	4	5	3	3	very novel and fun	37
19	2020/12/7 20:45:25	189second	Wechat	N/A		19	1	2	1	3	5	1	1	10	2	1	1	1	3	3	3	3	5	8	6	3	Scene modeling can be more realistic	42
20	2020/12/7 21:03:27	108second	Wechat	N/A		18	1	2	2	2	3	1	1	6	1	1	1	1	1	1	1	1	1	3	1	1	wonderful hope the process can be easier to get started	10
21	2020/12/7 21:19:57	76second	Wechat	N/A			1	1	2	2	4	2	2	3	5	2	2	2	2	1	3	3	4	5	3	2	Good experience, technology needs to be improved	30
22	2020/12/7 21:41:55	90second	Wechat	N/A			1	1	2	1	5	1	1	6	1	1	1	1	1	1	1	1	3	3	3	3	So much fun and easy to understand!	17
23	2020/12/7 21:49:00	169second	Wechat	N/A		20	1	1	2	2	2	1	1	5	2	2	2	2	6	2	1	2	3	4	2	2	Can you provide other experience scenarios, such as tooth extraction	24
24	2020/12/7 21:53:11	56second	Wechat	N/A		18	1	1	1	8	8	8	8	8	8	8	8	8	8	8	8	8	8	8	8	8	good	119
25	2020/12/7 21:57:59	69second	Wechat	N/A		18	1	1	1	1	6	1	1	1	1	1	1	1	1	1	1	1	1	5	1	1	very interesting	9
26	2020/12/9 16:00:28	187second	Wechat	N/A		20	1	2	2	7	4	6	7	7	7	7	7	7	6	7	8	8	7	7	7	7	pretty good	99
27	2020/12/9 16:12:39	191second	Wechat	N/A		19	1	2	1	8	8	7	8	8	7	8	9	9	8	8	8	8	8	9	8	9	really not bad	121
28	2020/12/9 16:16:09	75second	Wechat	N/A			1	2	2	1	1	1	5	6	7	2	1	1	1	1	1	1	1	4	3	1	not bad	21
29	2020/12/9 16:29:33	508second	Wechat	N/A		19	1	2	2	2	3	1	6	10	10	6	1	1	2	3	2	2	3	8	6	6	Interesting, but thought it would be more useful to go to the lab	55
30	2020/12/9 16:33:03	109second	Wechat	N/A		19	1	2	1	7	5	7	7	5	7	7	7	7	7	7	7	7	7	7	8	8	interesting	100
31	2020/12/9 16:39:52	203second	Wechat	N/A		20	1	2	1	3	5	3	3	3	7	2	2	3	4	3	2	3	6	5	6	6	Interesting experience, hope to add more guidance	49
32	2020/12/9 16:44:53	147second	Wechat	N/A		18	1	2	2	8	8	8	8	8	8	8	8	8	7	8	9	9	8	7	8	8	the experience is real	119
33	2020/12/9 16:50:15	148second	Wechat	N/A		19	1	2	2	1	8	1	3	10	3	1	2	3	1	2	2	1	1	2	3	1	Great	28
34	2020/12/9 16:54:01	92second	Wechat	N/A		20	1	2	1	1	2	1	2	10	1	1	2	1	2	1	2	1	2	1	1	1	great	15
35	2020/12/9 17:05:15	246second	Wechat	N/A		20	1	2	1	7	8	4	4	4	4	3	3	3	3	3	3	3	3	4	3	3	It still needs to be improved, the machine is too heavy, you can consider the monocular mode, and add degree adjustment, so that myopic students can have a better experience. Secondly, some angles of the device will be ambiguous. I hope the above suggestions can be adopted.	48
36	2020/12/9 17:08:19	127second	Wechat	N/A		17	1	2	2	1	5	1	2	7	4	3	4	4	4	3	2	2	4	6	4	3	it is good	42
37	2020/12/9 17:23:38	180second	Wechat	N/A		18	1	2	2	1	4	3	3	3	4	5	4	5	5	4	4	4	4	5	5	4	I hope to improve the clarity of the picture, and feel a little dizzy during the experience	50
38	2020/12/9 17:29:33	104second	Wechat	N/A		18	1	2	1	3	5	6	7	8	7	3	2	4	7	4	3	1	4	8	7	1	very good	63
39	2020/12/9 17:40:09	286second	Wechat	N/A		19	1	2	1	3	4	4	4	3	3	2	2	3	3	2	2	2	4	4	4	3	The experience feels good, the picture needs to be improved	35
40	2020/12/9 17:44:07	171second	Wechat	N/A			1	2	2	2	4	6	5	4	1	1	1	1	3	4	3	3	5	3	3	1	I feel that the future oral teaching can be replaced by vr, we will be very interested and more willing to take the initiative to learn.	33
41	2020/12/9 17:48:55	117second	Wechat	N/A		20	1	2	1	6	7	2	4	5	6	3	4	2	4	5	7	6	8	6	3	2	The experience is very good, the picture is very clear and very interesting.	63
42	2020/12/9 19:13:36	1387second	N/A	direct interview		20	2	2	1	3	10	1	4	6	5	2	3	2	3	3	2	2	8	9	8	1	good	55
43	2020/12/9 19:21:25	367second	Link	direct interview		19	2	2	2	4	7	3	2	2	5	3	3	2	4	3	1	2	2	5	4	1	nice	36
44	2020/12/9 19:29:43	448second	Link	direct interview		20	2	2	2	3	8	1	3	8	3	1	1	1	2	3	1	1	1	3	3	3	The application of VR is very beneficial to the learning of stomatology students. It makes the traditional abstract knowledge concrete and vivid, and the operation is very simple. It does not take too much time to learn the basic operation.	29
45	2020/12/9 19:35:08	243second	Link	direct interview		20	2	2	2	10	7	6	7	5	7	7	8	8	10	10	10	10	9	5	5	8	It's a little blurry, it's not very clear, but I'm satisfied with everything else	115
46	2020/12/9 19:42:49	394second	Link	direct interview		21	2	1	1	3	6	4	6	10	7	2	3	4	4	3	2	2	3	6	5	3	Very fresh, I hope to use it in the classroom in the future	56
47	2020/12/9 19:48:36	269second	Link	direct interview		21	2	1	2	1	3	1	8	6	4	1	2	6	5	4	2	1	5	10	4	1	I think VR teaching is a very novel teaching method. This immersive experience allows students to have a more direct and intuitive experience of practical operation. I think it is a very good new attempt.	47
48	2020/12/9 19:53:06	159second	Link	direct interview		20	2	1	1	2	2	1	1	2	1	2	1	3	5	1	1	1	3	5	1	1	Very fresh, looking forward to the improved content. Just like the relationship between e-books and paper books, it is a good auxiliary tool, but it is still difficult to replace traditional oral experiments.	16
49	2020/12/9 19:58:04	219second	Link	direct interview		19	2	1	1	1	1	1	8	10	3	4	1	4	10	2	1	4	10	10	7	5	Process is too simplistic	65
50	2020/12/9 20:05:39	382second	Link	direct interview		20	1	2	1	6	8	3	1	3	4	2	2	4	1	1	2	1	2	1	3	1	GOOD	28
51	2020/12/9 20:13:28	369second	Link	direct interview		19	1	2	2	2	8	3	3	10	1	1	1	1	8	1	1	1	2	2	1	1	Very new and satisfied	30
52	2020/12/9 20:19:38	318second	Link	direct interview		19	2	2	2	3	8	2	1	6	2	1	1	1	1	1	2	1	1	8	6	2	I feel very good! Hope to experience it in my study life as soon as possible	30
53	2020/12/9 20:24:37	257second	Link	direct interview		19	2	2	1	2	6	2	2	7	2	2	2	2	2	2	2	2	2	2	2	2	very real	26
54	2020/12/9 20:33:00	427second	Link	direct interview		20	2	1	2	2	7	3	5	3	6	2	2	2	6	3	3	1	4	2	2	3	It's fun, but a little less realistic	39
55	2020/12/9 20:41:31	438second	Link	direct interview		21	2	1	2	2	1	2	2	1	2	1	1	3	2	2	1	1	1	3	3	2	The experience is good, quite authentic, and it can help students review the main points	13
56	2020/12/9 20:46:59	251second	Link	direct interview		19	2	1	2	3	6	2	4	4	3	4	3	2	6	4	1	2	3	6	4	2	The sense of space is real, and the vibration returned by the handle is also quite clear. Since it is a data simulation, there may be special circumstances in reality. This can be added in future research projects to add more authenticity.	42
57	2020/12/9 20:50:26	153second	Link	direct interview		21	2	1	1	2	7	2	2	2	3	3	2	2	2	2	3	1	3	4	2	2	good	27
58	2020/12/9 21:18:02	86second	Link	direct interview		19	2	2	1	6	7	3	4	10	3	5	3	3	4	4	3	2	4	3	2	2	good	51
59	2020/12/9 21:24:01	94second	Link	direct interview		20	2	2	2	2	4	3	3	10	5	1	1	1	3	1	1	1	2	3	3	1	Great	28
60	2020/12/9 21:38:55	123second	Link	direct interview		18	2	2	1	3	9	1	1	1	2	1	1	1	1	1	2	1	1	7	2	1	It's fun and worth promoting!	19
61	2020/12/9 21:47:04	138second	Link	direct interview		20	2	2	2	4	4	10	8	8	8	4	4	4	10	2	2	2	8	9	4	6	The starting point is good, but the experience in the process can be better, and the scene can be more realistic and natural by upgrading the version.	80
62	2020/12/9 21:51:51	152second	Link	direct interview		19	2	1	2	1	7	4	8	9	6	2	4	3	9	2	2	4	3	10	5	3	It's very fresh, but it feels like the technology needs to be improved.	65
63	2020/12/9 21:56:19	138second	Link	direct interview		21	2	1	2	1	4	4	3	5	2	4	3	3	4	3	4	3	7	3	3	4	Haptic feedback is a little weird	43
64	2020/12/10 15:50:11	1391second	Link	direct interview		20	2	2	2	5	9	6	8	6	8	4	3	5	8	6	3	4	6	8	7	5	Haptic feedback is a little weird	84
65	2020/12/10 15:57:16	267second	Link	direct interview		20	2	2	1	1	2	2	2	6	3	1	1	2	1	3	4	3	4	5	5	4	very good	32
66	2020/12/10 16:08:35	626second	Link	direct interview		20	2	2	1	1	3	2	4	6	4	2	1	1	6	2	1	2	3	7	4	4	It is interesting and novel, and needs to be developed. I personally think that it will be better to combine with traditional learning, and it is not realistic to completely replace it.	36
67	2020/12/10 16:14:24	174second	Link	direct interview		20	2	2	1	2	6	4	6	1	6	1	1	1	6	1	1	1	6	6	6	3	Not real enough but still fun	41
68	2020/12/10 16:20:38	323second	Link	direct interview		19	2	1	2	2	3	2	1	2	1	2	2	2	2	2	1	1	1	6	2	1	The experience is good, I hope to carry out more related courses	16
69	2020/12/10 16:35:37	834second	Link	direct interview		19	2	2	1	7	7	3	7	7	7	2	2	2	2	2	1	1	1	1	1	1	Generally speaking, it is more simulated, but there are still some details that are not handled finely enough, sometimes stuck, and some delays. I hope there will be a greater improvement.	37
70	2020/12/10 16:42:14	350second	Link	direct interview		19	2	2	2	6	4	5	7	9	6	4	4	4	5	4	4	3	9	8	7	3	I think the VR experimental class can be more realistic, not just touch, the experience is more general, and more experience items can be added.	75
71	2020/12/10 16:47:31	173second	Link	direct interview		20	2	2	2	4	7	3	7	9	8	9	9	8	5	6	8	6	8	7	7	5	The technology feels immature, some animations are not realistic, and can be done better. But for ordinary students, such an experience is already very good	99
72	2020/12/10 16:50:02	88second	Link	direct interview		19	1	1	1	4	4	5	4	5	5	4	4	4	4	3	3	3	2	3	3	3	Let's take part in VR activities in the future	46
73	2020/12/10 16:57:30	396second	Link	direct interview		20	1	1	2	9	6	9	6	1	8	10	10	8	1	9	9	9	7	1	4	10	In fact, compared with the real environment, VR cannot accurately find the real patient position, but the feeling of using the equipment can bring new students a feeling and more motivation to learn	100
74	2020/12/10 17:02:01	209second	Link	direct interview		18	1	2	1	4	8	5	4	7	8	6	4	6	6	6	6	4	4	4	6	6	awesome	77
75	2020/12/10 17:03:45	63second	Link	direct interview		19	1	2	2	1	6	4	4	4	3	4	5	2	4	3	3	3	8	3	4	4	I think the experience is good and impressed	48
76	2020/12/10 17:08:51	279second	Link	direct interview		18	2	2	1	3	5	3	5	7	3	2	2	3	3	2	1	2	2	5	3	3	I think it is easy to understand and it will make me interested in learning	37
77	2020/12/10 17:12:57	188second	Link	direct interview		20	2	2	1	2	6	2	2	1	1	2	2	2	2	2	2	1	1	1	4	1	can greatly improve my perpetual recognition of future work.	17
78	2020/12/10 17:26:41	758second	Link	direct interview		18	1	1	1	1	2	1	3	1	2	1	1	2	1	3	2	2	1	3	3	2	A very good experience, I like it very much, I hope it can be promoted vigorously	14
79	2020/12/10 17:31:48	113second	Link	direct interview		19	1	2	1	3	5	1	1	6	8	6	1	3	2	4	2	1	3	1	1	2	very nice	33
80	2020/12/10 17:41:53	127second	Link	direct interview			1	2	1	2	8	4	7	1	3	1	1	2	5	2	1	1	1	3	2	1	very interesting	28
81	2020/12/10 19:02:56	181second	Link	direct interview		19	2	2	1	2	8	1	1	3	1	1	1	1	6	1	1	1	6	2	2	1	It can make us feel more real, and it also saves our resources in reality. At the same time, it also allows us to do practical exercises without any burden. The overall feeling is very good. I hope that more disciplines can use this VR technology in the future.	22
82	2020/12/10 19:21:38	275second	Link	direct interview		19	2	2	1	1	7	1	5	10	5	1	1	1	1	1	1	1	1	1	1	1	it is good!	23
83	2020/12/10 19:28:13	162second	Link	direct interview		20	2	2	1	4	6	4	4	10	4	1	1	1	7	4	2	2	5	5	4	2	pretty good	49
84	2020/12/10 19:35:25	158second	Link	direct interview		20	2	2	1	7	7	4	4	7	5	4	4	4	4	3	4	4	6	7	4	4	The overall experience is interesting, but the sense of use and animation fluency need to be improved.	65
85	2020/12/10 19:39:03	95second	Link	direct interview		20	2	2	1	2	3	3	4	10	2	2	2	2	5	3	2	2	6	7	4	2	In fact, it feels good, if the operation can be more specific, it will be better	44
86	2020/12/10 19:49:03	133second	Link	direct interview		19	2	2	2	1	2	1	2	2	1	1	1	1	3	1	1	1	1	6	4	3	none	15
87	2020/12/10 19:59:11	280second	Link	direct interview		19	2	2	1	4	7	4	6	6	6	7	6	6	4	4	1	3	4	9	9	2	It is a very different experience from other teaching, it is novel, and it is convenient for the imagination and understanding of the model, but it cannot replace traditional teaching, especially the operation.	71
88	2020/12/10 20:03:44	154second	Link	direct interview		19	2	2	1	5	6	3	4	5	5	1	1	1	10	4	1	1	5	10	4	3	lt is ok	52
89	2020/12/10 20:12:11	211second	Link	direct interview		19	2	1	2	4	6	4	5	7	7	3	2	5	5	5	2	2	5	5	5	3	Overall good, but some operational details and guidance could be improved	58
90	2020/12/10 20:26:00	112second	Link	direct interview		19	2	2	1	10	7	7	7	3	8	8	8	8	9	8	8	8	8	5	8	8	not bad	111
91	2020/12/10 20:39:58	343second	Link	direct interview		20	2	2	2	1	4	4	3	10	7	4	3	3	8	2	1	3	4	10	4	1	Overall the experience was pretty good. The realism of the scene is relatively high, but the real feeling of the operation is not very strong, and I hope that in the future, myopia users can adjust the degree of myopia.	55
92	2020/12/10 20:45:56	181second	Link	direct interview		20	2	2	1	4	4	6	7	5	6	4	5	5	10	6	3	6	6	10	9	7	A new learning method has been opened, but I feel that there are still many places to improve, such as realism, sensitivity, and complexity. I feel that it can be improved further. Hard working guides.	86
93	2020/12/10 20:52:41	134second	Link	direct interview		19	2	1	2	2	4	3	3	8	3	2	2	2	5	3	4	4	4	4	3	3	really not bad	42
94	2020/12/10 20:57:42	221second	Link	direct interview		19	2	2	2	3	10	1	2	4	6	3	2	2	2	2	4	2	2	2	2	2	Can really feel the clinical effect and help us learn	34
95	2020/12/10 21:14:14	624second	Link	direct interview		18	1	1	2	3	5	7	7	6	1	1	1	1	6	3	2	1	3	4	3	1	Interesting, buggy but innocuous.	38
96	2020/12/10 21:18:06	157second	Link	direct interview		21	1	2	2	4	5	4	4	5	5	4	4	5	3	4	4	3	4	5	5	4	good	55
97	2020/12/10 21:26:39	148second	Link	direct interview		18	1	2	1	1	5	6	4	10	4	4	3	3	3	5	2	3	4	5	5	4	good	54
98	2021/1/14 8:40:33	73second	Wechat	N/A		18	1	1	2	4	4	4	4	5	4	4	4	4	4	4	4	4	4	4	4	5	pretty good	53
99	2021/1/14 8:41:26	127second	Wechat	N/A		18	1	1	1	2	4	3	3	2	4	2	3	2	3	3	2	3	2	3	2	3	Advantages Strong operability, vivid image, make people interested Insufficient Restoration is not enough	29
100	2021/1/14 8:41:36	158second	Wechat	N/A		20	1	1	1	4	8	4	4	6	5	1	1	3	8	2	1	1	5	7	3	1	It is really a very good idea to apply VR to stomatology teaching. I hope VR can become more and more perfect and can be closer to the real experience.	47
101	2021/1/14 8:50:21	139second	Wechat	N/A		17	1	2	1	4	4	7	7	7	8	4	4	5	8	4	4	5	7	5	7	4	In general, no reference object	77
102	2021/1/14 9:23:58	98second	Wechat	N/A		18	1	2	1	4	6	5	5	6	7	4	4	4	4	4	4	4	4	6	5	5	Fun and interesting while improving learning efficiency	64
103	2021/1/14 9:28:13	185second	Wechat	N/A		18	1	2	2	4	6	4	4	6	6	3	3	3	4	3	2	3	5	8	6	3	It looks a little fuzzy, but overall it's good, maybe it can be more detailed	56
104	2021/1/14 9:34:35	146second	Wechat	N/A		19	1	1	1	1	3	2	1	2	2	1	1	1	3	2	1	1	2	6	4	3	The overall effect is great	19
105	2021/1/14 9:34:37	61second	Wechat	N/A			1	1	1	3	3	7	3	7	3	3	3	3	5	3	2	4	3	6	6	4	is acceptable	51
106	2021/1/14 9:37:54	127second	Wechat	N/A		18	1	2	1	3	5	6	4	9	7	4	3	4	6	5	3	4	5	6	5	4	good	66
107	2021/1/14 9:38:14	109second	Wechat	N/A		18	1	1	2	3	3	4	3	6	5	3	3	3	4	2	3	3	4	5	5	4	very helpful for learning	46
108	2021/1/14 9:42:07	42second	Wechat	N/A		18	1	2	1	6	6	6	5	6	5	6	5	7	5	7	6	4	7	5	6	5	pretty good	80
109	2021/1/14 9:45:59	155second	Wechat	N/A		18	1	1	2	5	3	5	7	6	3	5	5	5	5	5	5	5	5	5	5	4	The experience is very good, but the sensitivity needs to be improved, and the determination of the surgical site is slightly rough.	66
110	2021/1/14 9:47:28	68second	Wechat	N/A		19	1	2	1	1	5	1	1	2	2	1	3	2	1	2	1	2	3	1	1	1	none	13
111	2021/1/14 9:56:09	50second	Wechat	N/A		19	1	2	1	6	6	6	6	6	6	6	6	6	6	6	6	6	6	6	6	6	Fresh	85
112	2021/1/14 9:58:22	49second	Wechat	N/A		18	1	2	1	1	1	1	1	1	1	1	1	1	1	1	1	1	1	10	6	1	nice	14
113	2021/1/14 10:02:58	108second	Wechat	N/A			1	2	1	4	5	3	2	4	1	3	1	5	10	1	1	1	4	10	4	1	After the screen optimization, the experience will be better	43
114	2021/1/14 10:08:32	172second	Wechat	N/A		18	1	2	1	3	3	3	5	3	8	3	3	3	7	3	2	2	8	10	6	2	There is still room for improvement, for example, it can allow us to pick up the instruments out of order and carefully observe various instruments and their actual operation	57
115	2021/1/14 10:10:23	69second	Wechat	N/A		19	1	1	1	4	4	4	3	3	3	3	4	4	4	4	5	4	4	3	3	5	is acceptable	47
116	2021/1/14 10:21:31	214second	Wechat	N/A		19	1	1	1	2	2	4	3	4	9	2	1	4	8	4	1	1	7	4	3	2	Increase the fun of learning and make the operation steps clearer	44
117	2021/1/14 10:33:11	127second	Wechat	N/A		18	1	2	1	2	3	1	1	1	3	1	1	1	5	1	1	1	2	5	4	1	ˆ_ˆ	17
118	2021/1/14 11:12:07	133second	Wechat	N/A		18	1	1	1	3	3	6	4	6	4	4	5	4	7	6	1	3	4	4	5	1	At present, I feel that it is suitable for auxiliary teaching, and the effect of related functions needs to be improved.	53
119	2021/1/14 11:43:28	173second	Wechat	N/A		19	1	1	1	2	5	3	2	2	2	2	2	2	2	2	2	2	2	3	2	2	I think this VR experience can give us a better way to learn	22
120	2021/1/14 13:55:10	129second	Wechat	N/A		20	1	2	1	9	7	9	6	4	7	9	9	7	9	7	8	7	6	3	4	7	I think it can be used as a good tool to stimulate interest in the course, but it can't accurately experience the actual process of operation	101
						18.991
						0.967617

## Sheet: 2. validation
Case Processing Summary	Case Processing Summary	Case Processing Summary
	Cases
	Valid		Missing		Total
	N	Percent	N	Percent	N	Percent
1. The VR system is easy to use.	119	1	0	0	119	1
2. I am able to study and master VR training programme even without the support of technical person.	119	1	0	0	119	1
3. I truly perceive the touch and vibration in term of virtual environment during the operation.	119	1	0	0	119	1
4. VR helps me to accurately understand and practise the operation of dental implant surgery clinically.	119	1	0	0	119	1
5. I repeatedly experienced this operation just now.	119	1	0	0	119	1
6. The 30-minute VR training is enough for me to learn the key points in this module.	119	1	0	0	119	1
7. The VR system is conducive to encourage me to study the content of this module.	119	1	0	0	119	1
8. The application of VR system makes learning process fun.	119	1	0	0	119	1
9. VR system makes the learning more efficiently.	119	1	0	0	119	1
10. In regard to learning outcome, I think that VR system is better than the traditional operation in laboratory.	119	1	0	0	119	1
11. Generally, I think that the VR experience is helpful for my study of dental implant.	119	1	0	0	119	1
12. Regarding to the content of this module, I think that the VR system should be combined with the traditionally practical approach.	119	1	0	0	119	1
13. VR system is very suitable for implementing as an complimentary teaching approach in dental practical sessions.	119	1	0	0	119	1
14. From my experience in utilizing VR system today, I think that the VR system appears to be a mature technology and supplies the real-word environment.	119	1	0	0	119	1
15. I think that the traditional practical teaching in dental education would be replaced by VR system in the future.	119	1	0	0	119	1
16. I would like to spend more time studying dental courses using VR system.	119	1	0	0	119	1
17. After experiencing VR system, I expect that VR system is utilized by other scientific disciplines in teaching and learning.	119	1	0	0	119	1
	There are 119 data in each group of this case, all of which are included in the graph drawing. No data points are located in the upper and lower ranges of the boxplot error bars, and there are no abnormal data in this case.

## Sheet: 3. Normal distribution
Tests of Normality
	Kolmogorov-Smirnova			Shapiro-Wilk
	Statistic	df	Sig.	Statistic	df	Sig.
1. The VR system is easy to use.	0.202616	119	4.6569e-13	0.855653	119	2.09597e-09
2. I am able to study and master VR training programme even without the support of technical person.	0.107976	119	0.00165898	0.966092	119	0.00423756			P are less than 0.05
3. I truly perceive the touch and vibration in term of virtual environment during the operation.	0.159907	119	6.33622e-08	0.884399	119	3.74272e-08
4. VR helps me to accurately understand and practise the operation of dental implant surgery clinically.	0.149451	119	7.11823e-07	0.936696	119	2.78242e-05
5. I repeatedly experienced this operation just now.	0.104372	119	0.00283217	0.932316	119	1.45505e-05
6. The 30-minute VR training is enough for me to learn the key points in this module.	0.128998	119	4.7059e-05	0.940534	119	5.0023e-05
7. The VR system is conducive to encourage me to study the content of this module.	0.188831	119	2.97238e-11	0.836026	119	3.59307e-10
8. The application of VR system makes learning process fun.	0.19037	119	1.89946e-11	0.805914	119	3.08659e-11
9. VR system makes the learning more efficiently.	0.17873	119	5.08359e-10	0.868596	119	7.30606e-09
10. In regard to learning outcome, I think that VR system is better than the traditional operation in laboratory.	0.112111	119	0.00087383	0.938207	119	3.49735e-05
11. Generally, I think that the VR experience is helpful for my study of dental implant.	0.189849	119	2.21111e-11	0.878186	119	1.93869e-08
12. Regarding to the content of this module, I think that the VR system should be combined with the traditionally practical approach.	0.252079	119	1.07169e-20	0.768582	119	2.05353e-12
13. VR system is very suitable for implementing as an complimentary teaching approach in dental practical sessions.	0.208783	119	6.53029e-14	0.792062	119	1.08676e-11
14. From my experience in utilizing VR system today, I think that the VR system appears to be a mature technology and supplies the real-word environment.	0.145192	119	1.80727e-06	0.930802	119	1.16888e-05
15. I think that the traditional practical teaching in dental education would be replaced by VR system in the future.	0.111292	119	0.00099435	0.955988	119	0.000648616
16. I would like to spend more time studying dental courses using VR system.	0.135236	119	1.41373e-05	0.955915	119	0.00064028
17. After experiencing VR system, I expect that VR system is utilized by other scientific disciplines in teaching and learning.	0.200432	119	9.19424e-13	0.848379	119	1.07181e-09
a. Lilliefors Significance Correction

## Sheet: 4. pearson's analysis
Correlations
			1. The VR system is easy to use.	2. I am able to study and master VR training programme even without the support of technical person.	3. I truly perceive the touch and vibration in term of virtual environment during the operation.	4. VR helps me to accurately understand and practise the operation of dental implant surgery clinically.	5. I repeatedly experienced this operation just now.	6. The 30-minute VR training is enough for me to learn the key points in this module.	7. The VR system is conducive to encourage me to study the content of this module.	8. The application of VR system makes learning process fun.	9. VR system makes the learning more efficiently.	10. In regard to learning outcome, I think that VR system is better than the traditional operation in laboratory.	11. Generally, I think that the VR experience is helpful for my study of dental implant.	12. Regarding to the content of this module, I think that the VR system should be combined with the traditionally practical approach.	13. VR system is very suitable for implementing as an complimentary teaching approach in dental practical sessions.	14. From my experience in utilizing VR system today, I think that the VR system appears to be a mature technology and supplies the real-word environment.	15. I think that the traditional practical teaching in dental education would be replaced by VR system in the future.	16. I would like to spend more time studying dental courses using VR system.	17. After experiencing VR system, I expect that VR system is utilized by other scientific disciplines in teaching and learning.
Spearman's rho	1. The VR system is easy to use.	Correlation Coefficient	1	.452**	.610**	.531**	0.0865603	.514**	.591**	.601**	.615**	.404**	.636**	.545**	.512**	.478**	.181*	.421**	.436**
		Sig. (2-tailed)		2.42004e-07	1.84834e-13	5.43446e-10	0.349246	2.34397e-09	1.46028e-12	4.76524e-13	9.89586e-14	5.05604e-06	7.48025e-15	1.41412e-10	2.71967e-09	3.76135e-08	0.0488678	1.85653e-06	7.29675e-07
		N	119	119	119	119	119	119	119	119	119	119	119	119	119	119	119	119	119
	2. I am able to study and master VR training programme even without the support of technical person.	Correlation Coefficient	.452**	1	.301**	.250**	0.160935	.318**	.235*	.286**	.230*	0.143968	.236**	.330**	.198*	0.173693	0.0111777	0.170979	0.177395
		Sig. (2-tailed)	2.42004e-07		0.000893054	0.00618676	0.0803805	0.000419341	0.0102489	0.00161928	0.0117944	0.118271	0.00963126	0.000243603	0.0310576	0.0588711	0.903968	0.0630005	0.0535997
		N	119	119	119	119	119	119	119	119	119	119	119	119	119	119	119	119	119
	3. I truly perceive the touch and vibration in term of virtual environment during the operation.	Correlation Coefficient	.610**	.301**	1	.658**	0.174447	.522**	.626**	.627**	.648**	.555**	.652**	.597**	.655**	.586**	0.180038	.526**	.607**
		Sig. (2-tailed)	1.84834e-13	0.000893054		4.56017e-16	0.0577645	1.10636e-09	2.61742e-14	2.31154e-14	1.5624e-15	5.62108e-11	9.53737e-16	7.68466e-13	6.18183e-16	2.48657e-12	0.0500782	7.95308e-10	2.43034e-13
		N	119	119	119	119	119	119	119	119	119	119	119	119	119	119	119	119	119
	4. VR helps me to accurately understand and practise the operation of dental implant surgery clinically.	Correlation Coefficient	.531**	.250**	.658**	1	.377**	.639**	.556**	.550**	.588**	.554**	.636**	.462**	.538**	.600**	.355**	.543**	.501**
		Sig. (2-tailed)	5.43446e-10	0.00618676	4.56017e-16		2.3553e-05	5.42508e-15	5.4634e-11	9.37486e-11	1.95537e-12	6.20806e-11	7.58672e-15	1.20944e-07	2.76292e-10	5.26229e-13	7.5353e-05	1.77215e-10	6.60747e-09
		N	119	119	119	119	119	119	119	119	119	119	119	119	119	119	119	119	119
	5. I repeatedly experienced this operation just now.	Correlation Coefficient	0.0865603	0.160935	0.174447	.377**	1	.344**	.223*	0.162953	0.179538	.257**	.226*	0.160324	.222*	.281**	.254**	.267**	.203*
		Sig. (2-tailed)	0.349246	0.0803805	0.0577645	2.3553e-05		0.000127771	0.0146214	0.076611	0.0507298	0.00481262	0.0134022	0.0815522	0.0154669	0.00197475	0.00522984	0.00335386	0.0266383
		N	119	119	119	119	119	119	119	119	119	119	119	119	119	119	119	119	119
	6. The 30-minute VR training is enough for me to learn the key points in this module.	Correlation Coefficient	.514**	.318**	.522**	.639**	.344**	1	.644**	.528**	.585**	.423**	.564**	.445**	.472**	.543**	.277**	.507**	.539**
		Sig. (2-tailed)	2.34397e-09	0.000419341	1.10636e-09	5.42508e-15	0.000127771		2.60841e-15	7.01401e-10	2.74921e-12	1.64611e-06	2.36904e-11	4.07568e-07	6.1839e-08	1.69994e-10	0.00231197	4.07719e-09	2.50599e-10
		N	119	119	119	119	119	119	119	119	119	119	119	119	119	119	119	119	119
	7. The VR system is conducive to encourage me to study the content of this module.	Correlation Coefficient	.591**	.235*	.626**	.556**	.223*	.644**	1	.835**	.813**	.451**	.740**	.685**	.766**	.592**	.220*	.537**	.693**
		Sig. (2-tailed)	1.46028e-12	0.0102489	2.61742e-14	5.4634e-11	0.0146214	2.60841e-15		4.1868e-32	2.9376e-29	2.71659e-07	7.09216e-22	8.37844e-18	3.67675e-24	1.39435e-12	0.0160329	3.06454e-10	2.5425e-18
		N	119	119	119	119	119	119	119	119	119	119	119	119	119	119	119	119	119
	8. The application of VR system makes learning process fun.	Correlation Coefficient	.601**	.286**	.627**	.550**	0.162953	.528**	.835**	1	.816**	.413**	.746**	.718**	.798**	.544**	.182*	.525**	.614**
		Sig. (2-tailed)	4.76524e-13	0.00161928	2.31154e-14	9.37486e-11	0.076611	7.01401e-10	4.1868e-32		1.39699e-29	2.98907e-06	2.27926e-22	4.22099e-20	1.57233e-27	1.59093e-10	0.047147	8.86843e-10	1.16925e-13
		N	119	119	119	119	119	119	119	119	119	119	119	119	119	119	119	119	119
	9. VR system makes the learning more efficiently.	Correlation Coefficient	.615**	.230*	.648**	.588**	0.179538	.585**	.813**	.816**	1	.518**	.746**	.642**	.692**	.577**	.260**	.572**	.605**
		Sig. (2-tailed)	9.89586e-14	0.0117944	1.5624e-15	1.95537e-12	0.0507298	2.74921e-12	2.9376e-29	1.39699e-29		1.6366e-09	1.96287e-22	3.43367e-15	2.82151e-18	6.23985e-12	0.0043518	1.07614e-11	3.07467e-13
		N	119	119	119	119	119	119	119	119	119	119	119	119	119	119	119	119	119
	10. In regard to learning outcome, I think that VR system is better than the traditional operation in laboratory.	Correlation Coefficient	.404**	0.143968	.555**	.554**	.257**	.423**	.451**	.413**	.518**	1	.511**	.253**	.434**	.614**	.464**	.503**	.383**
		Sig. (2-tailed)	5.05604e-06	0.118271	5.62108e-11	6.20806e-11	0.00481262	1.64611e-06	2.71659e-07	2.98907e-06	1.6366e-09		2.88729e-09	0.00551508	7.98036e-07	1.16161e-13	1.05182e-07	5.48683e-09	1.68398e-05
		N	119	119	119	119	119	119	119	119	119	119	119	119	119	119	119	119	119
	11. Generally, I think that the VR experience is helpful for my study of dental implant.	Correlation Coefficient	.636**	.236**	.652**	.636**	.226*	.564**	.740**	.746**	.746**	.511**	1	.703**	.749**	.635**	.220*	.576**	.636**
		Sig. (2-tailed)	7.48025e-15	0.00963126	9.53737e-16	7.58672e-15	0.0134022	2.36904e-11	7.09216e-22	2.27926e-22	1.96287e-22	2.88729e-09		5.35792e-19	1.18504e-22	8.33986e-15	0.0163447	7.31768e-12	7.70149e-15
		N	119	119	119	119	119	119	119	119	119	119	119	119	119	119	119	119	119
	12. Regarding to the content of this module, I think that the VR system should be combined with the traditionally practical approach.	Correlation Coefficient	.545**	.330**	.597**	.462**	0.160324	.445**	.685**	.718**	.642**	.253**	.703**	1	.797**	.586**	0.0980668	.479**	.699**
		Sig. (2-tailed)	1.41412e-10	0.000243603	7.68466e-13	1.20944e-07	0.0815522	4.07568e-07	8.37844e-18	4.22099e-20	3.43367e-15	0.00551508	5.35792e-19		2.45871e-27	2.42669e-12	0.288667	3.665e-08	9.44094e-19
		N	119	119	119	119	119	119	119	119	119	119	119	119	119	119	119	119	119
	13. VR system is very suitable for implementing as an complimentary teaching approach in dental practical sessions.	Correlation Coefficient	.512**	.198*	.655**	.538**	.222*	.472**	.766**	.798**	.692**	.434**	.749**	.797**	1	.659**	.281**	.617**	.778**
		Sig. (2-tailed)	2.71967e-09	0.0310576	6.18183e-16	2.76292e-10	0.0154669	6.1839e-08	3.67675e-24	1.57233e-27	2.82151e-18	7.98036e-07	1.18504e-22	2.45871e-27		3.98501e-16	0.00200184	8.19203e-14	2.44168e-25
		N	119	119	119	119	119	119	119	119	119	119	119	119	119	119	119	119	119
	14. From my experience in utilizing VR system today, I think that the VR system appears to be a mature technology and supplies the real-word environment.	Correlation Coefficient	.478**	0.173693	.586**	.600**	.281**	.543**	.592**	.544**	.577**	.614**	.635**	.586**	.659**	1	.406**	.594**	.603**
		Sig. (2-tailed)	3.76135e-08	0.0588711	2.48657e-12	5.26229e-13	0.00197475	1.69994e-10	1.39435e-12	1.59093e-10	6.23985e-12	1.16161e-13	8.33986e-15	2.42669e-12	3.98501e-16		4.5743e-06	1.11568e-12	3.81726e-13
		N	119	119	119	119	119	119	119	119	119	119	119	119	119	119	119	119	119
	15. I think that the traditional practical teaching in dental education would be replaced by VR system in the future.	Correlation Coefficient	.181*	0.0111777	0.180038	.355**	.254**	.277**	.220*	.182*	.260**	.464**	.220*	0.0980668	.281**	.406**	1	.675**	.246**
		Sig. (2-tailed)	0.0488678	0.903968	0.0500782	7.5353e-05	0.00522984	0.00231197	0.0160329	0.047147	0.0043518	1.05182e-07	0.0163447	0.288667	0.00200184	4.5743e-06		4.05073e-17	0.00693161
		N	119	119	119	119	119	119	119	119	119	119	119	119	119	119	119	119	119
	16. I would like to spend more time studying dental courses using VR system.	Correlation Coefficient	.421**	0.170979	.526**	.543**	.267**	.507**	.537**	.525**	.572**	.503**	.576**	.479**	.617**	.594**	.675**	1	.615**
		Sig. (2-tailed)	1.85653e-06	0.0630005	7.95308e-10	1.77215e-10	0.00335386	4.07719e-09	3.06454e-10	8.86843e-10	1.07614e-11	5.48683e-09	7.31768e-12	3.665e-08	8.19203e-14	1.11568e-12	4.05073e-17		1.02004e-13
		N	119	119	119	119	119	119	119	119	119	119	119	119	119	119	119	119	119
	17. After experiencing VR system, I expect that VR system is utilized by other scientific disciplines in teaching and learning.	Correlation Coefficient	.436**	0.177395	.607**	.501**	.203*	.539**	.693**	.614**	.605**	.383**	.636**	.699**	.778**	.603**	.246**	.615**	1
		Sig. (2-tailed)	7.29675e-07	0.0535997	2.43034e-13	6.60747e-09	0.0266383	2.50599e-10	2.5425e-18	1.16925e-13	3.07467e-13	1.68398e-05	7.70149e-15	9.44094e-19	2.44168e-25	3.81726e-13	0.00693161	1.02004e-13
		N	119	119	119	119	119	119	119	119	119	119	119	119	119	119	119	119	119
**. Correlation is significant at the 0.01 level (2-tailed).
*. Correlation is significant at the 0.05 level (2-tailed).
Post data analysis with pearson correlation

## Sheet: 5. mean and SD (Table 2)
Descriptive Statistics
	N	Minimum	Maximum	Mean	Std. Deviation	Skewness
	Statistic	Statistic	Statistic	Statistic	Statistic	Statistic	Std. Error
1. The VR system is easy to use.	119	2	10	4.4874	2.40009	1.009	0.222
2. I am able to study and master VR training programme even without the support of technical person.	119	2	10	6.1513	2.2271	-0.053	0.222
3. I truly perceive the touch and vibration in term of virtual environment during the operation.	119	2	10	4.5714	2.32004	0.721	0.222
4. VR helps me to accurately understand and practise the operation of dental implant surgery clinically.	119	2	10	5.2605	2.25292	0.307	0.222
5. I repeatedly experienced this operation just now.	119	2	10	6.5126	2.62603	-0.223	0.222
6. The 30-minute VR training is enough for me to learn the key points in this module.	119	2	10	5.5966	2.39462	0.048	0.222
7. The VR system is conducive to encourage me to study the content of this module.	119	2	10	4.2773	2.33588	1.066	0.222
8. The application of VR system makes learning process fun.	119	2	10	4.1429	2.34443	1.214	0.222
9. VR system makes the learning more efficiently.	119	2	10	4.3866	2.24027	0.952	0.222
10. In regard to learning outcome, I think that VR system is better than the traditional operation in laboratory.	119	2	10	5.6303	2.56728	0.261	0.222
11. Generally, I think that the VR experience is helpful for my study of dental implant.	119	2	10	4.521	2.15835	0.969	0.222
12. Regarding to the content of this module, I think that the VR system should be combined with the traditionally practical approach.	119	2	10	3.9496	2.36804	1.385	0.222
13. VR system is very suitable for implementing as an complimentary teaching approach in dental practical sessions.	119	2	10	4.0084	2.31976	1.286	0.222
14. From my experience in utilizing VR system today, I think that the VR system appears to be a mature technology and supplies the real-word environment.	119	2	10	5.1765	2.3887	0.398	0.222
15. I think that the traditional practical teaching in dental education would be replaced by VR system in the future.	119	2	10	6.2521	2.4294	0.003	0.222
16. I would like to spend more time studying dental courses using VR system.	119	2	10	5.3193	2.15867	0.457	0.222
17. After experiencing VR system, I expect that VR system is utilized by other scientific disciplines in teaching and learning.	119	2	10	4.2269	2.21488	1.069	0.222
Valid N (listwise)	119

## Sheet: 6. spearman
Correlations
			Your age?	1. The VR system is easy to use.	2. I am able to study and master VR training programme even without the support of technical person.	3. I truly perceive the touch and vibration in term of virtual environment during the operation.	4. VR helps me to accurately understand and practise the operation of dental implant surgery clinically.	5. I repeatedly experienced this operation just now.	6. The 30-minute VR training is enough for me to learn the key points in this module.	7. The VR system is conducive to encourage me to study the content of this module.	8. The application of VR system makes learning process fun.	9. VR system makes the learning more efficiently.	10. In regard to learning outcome, I think that VR system is better than the traditional operation in laboratory.	11. Generally, I think that the VR experience is helpful for my study of dental implant.	12. Regarding to the content of this module, I think that the VR system should be combined with the traditionally practical approach.	13. VR system is very suitable for implementing as an complimentary teaching approach in dental practical sessions.	14. From my experience in utilizing VR system today, I think that the VR system appears to be a mature technology and supplies the real-word environment.	15. I think that the traditional practical teaching in dental education would be replaced by VR system in the future.	16. I would like to spend more time studying dental courses using VR system.	17. After experiencing VR system, I expect that VR system is utilized by other scientific disciplines in teaching and learning.
Spearman's rho	Your age?	Correlation Coefficient	1	0.0965022	.281**	-0.0184319	0.0262374	.201*	0.164703	0.00723732	-0.0169566	-0.0791939	-0.0644911	-0.0429097	0.0154529	-0.0370893	0.050312	0.0880279	0.175799	-0.00134003
		Sig. (2-tailed)		0.296466	0.0019698	0.842291	0.77699	0.0280721	0.0734567	0.937735	0.85477	0.391925	0.485918	0.643105	0.867526	0.688815	0.586861	0.341105	0.0558228	0.98846
		N	119	119	119	119	119	119	119	119	119	119	119	119	119	119	119	119	119	119
	1. The VR system is easy to use.	Correlation Coefficient	0.0965022	1	.452**	.610**	.531**	0.0865603	.514**	.591**	.601**	.615**	.404**	.636**	.545**	.512**	.478**	.181*	.421**	.436**
		Sig. (2-tailed)	0.296466		2.42004e-07	1.84834e-13	5.43446e-10	0.349246	2.34397e-09	1.46028e-12	4.76524e-13	9.89586e-14	5.05604e-06	7.48025e-15	1.41412e-10	2.71967e-09	3.76135e-08	0.0488678	1.85653e-06	7.29675e-07
		N	119	119	119	119	119	119	119	119	119	119	119	119	119	119	119	119	119	119
	2. I am able to study and master VR training programme even without the support of technical person.	Correlation Coefficient	.281**	.452**	1	.301**	.250**	0.160935	.318**	.235*	.286**	.230*	0.143968	.236**	.330**	.198*	0.173693	0.0111777	0.170979	0.177395
		Sig. (2-tailed)	0.0019698	2.42004e-07		0.000893054	0.00618676	0.0803805	0.000419341	0.0102489	0.00161928	0.0117944	0.118271	0.00963126	0.000243603	0.0310576	0.0588711	0.903968	0.0630005	0.0535997
		N	119	119	119	119	119	119	119	119	119	119	119	119	119	119	119	119	119	119
	3. I truly perceive the touch and vibration in term of virtual environment during the operation.	Correlation Coefficient	-0.0184319	.610**	.301**	1	.658**	0.174447	.522**	.626**	.627**	.648**	.555**	.652**	.597**	.655**	.586**	0.180038	.526**	.607**
		Sig. (2-tailed)	0.842291	1.84834e-13	0.000893054		4.56017e-16	0.0577645	1.10636e-09	2.61742e-14	2.31154e-14	1.5624e-15	5.62108e-11	9.53737e-16	7.68466e-13	6.18183e-16	2.48657e-12	0.0500782	7.95308e-10	2.43034e-13
		N	119	119	119	119	119	119	119	119	119	119	119	119	119	119	119	119	119	119
	4. VR helps me to accurately understand and practise the operation of dental implant surgery clinically.	Correlation Coefficient	0.0262374	.531**	.250**	.658**	1	.377**	.639**	.556**	.550**	.588**	.554**	.636**	.462**	.538**	.600**	.355**	.543**	.501**
		Sig. (2-tailed)	0.77699	5.43446e-10	0.00618676	4.56017e-16		2.3553e-05	5.42508e-15	5.4634e-11	9.37486e-11	1.95537e-12	6.20806e-11	7.58672e-15	1.20944e-07	2.76292e-10	5.26229e-13	7.5353e-05	1.77215e-10	6.60747e-09
		N	119	119	119	119	119	119	119	119	119	119	119	119	119	119	119	119	119	119
	5. I repeatedly experienced this operation just now.	Correlation Coefficient	.201*	0.0865603	0.160935	0.174447	.377**	1	.344**	.223*	0.162953	0.179538	.257**	.226*	0.160324	.222*	.281**	.254**	.267**	.203*
		Sig. (2-tailed)	0.0280721	0.349246	0.0803805	0.0577645	2.3553e-05		0.000127771	0.0146214	0.076611	0.0507298	0.00481262	0.0134022	0.0815522	0.0154669	0.00197475	0.00522984	0.00335386	0.0266383
		N	119	119	119	119	119	119	119	119	119	119	119	119	119	119	119	119	119	119
	6. The 30-minute VR training is enough for me to learn the key points in this module.	Correlation Coefficient	0.164703	.514**	.318**	.522**	.639**	.344**	1	.644**	.528**	.585**	.423**	.564**	.445**	.472**	.543**	.277**	.507**	.539**
		Sig. (2-tailed)	0.0734567	2.34397e-09	0.000419341	1.10636e-09	5.42508e-15	0.000127771		2.60841e-15	7.01401e-10	2.74921e-12	1.64611e-06	2.36904e-11	4.07568e-07	6.1839e-08	1.69994e-10	0.00231197	4.07719e-09	2.50599e-10
		N	119	119	119	119	119	119	119	119	119	119	119	119	119	119	119	119	119	119
	7. The VR system is conducive to encourage me to study the content of this module.	Correlation Coefficient	0.00723732	.591**	.235*	.626**	.556**	.223*	.644**	1	.835**	.813**	.451**	.740**	.685**	.766**	.592**	.220*	.537**	.693**
		Sig. (2-tailed)	0.937735	1.46028e-12	0.0102489	2.61742e-14	5.4634e-11	0.0146214	2.60841e-15		4.1868e-32	2.9376e-29	2.71659e-07	7.09216e-22	8.37844e-18	3.67675e-24	1.39435e-12	0.0160329	3.06454e-10	2.5425e-18
		N	119	119	119	119	119	119	119	119	119	119	119	119	119	119	119	119	119	119
	8. The application of VR system makes learning process fun.	Correlation Coefficient	-0.0169566	.601**	.286**	.627**	.550**	0.162953	.528**	.835**	1	.816**	.413**	.746**	.718**	.798**	.544**	.182*	.525**	.614**
		Sig. (2-tailed)	0.85477	4.76524e-13	0.00161928	2.31154e-14	9.37486e-11	0.076611	7.01401e-10	4.1868e-32		1.39699e-29	2.98907e-06	2.27926e-22	4.22099e-20	1.57233e-27	1.59093e-10	0.047147	8.86843e-10	1.16925e-13
		N	119	119	119	119	119	119	119	119	119	119	119	119	119	119	119	119	119	119
	9. VR system makes the learning more efficiently.	Correlation Coefficient	-0.0791939	.615**	.230*	.648**	.588**	0.179538	.585**	.813**	.816**	1	.518**	.746**	.642**	.692**	.577**	.260**	.572**	.605**
		Sig. (2-tailed)	0.391925	9.89586e-14	0.0117944	1.5624e-15	1.95537e-12	0.0507298	2.74921e-12	2.9376e-29	1.39699e-29		1.6366e-09	1.96287e-22	3.43367e-15	2.82151e-18	6.23985e-12	0.0043518	1.07614e-11	3.07467e-13
		N	119	119	119	119	119	119	119	119	119	119	119	119	119	119	119	119	119	119
	10. In regard to learning outcome, I think that VR system is better than the traditional operation in laboratory.	Correlation Coefficient	-0.0644911	.404**	0.143968	.555**	.554**	.257**	.423**	.451**	.413**	.518**	1	.511**	.253**	.434**	.614**	.464**	.503**	.383**
		Sig. (2-tailed)	0.485918	5.05604e-06	0.118271	5.62108e-11	6.20806e-11	0.00481262	1.64611e-06	2.71659e-07	2.98907e-06	1.6366e-09		2.88729e-09	0.00551508	7.98036e-07	1.16161e-13	1.05182e-07	5.48683e-09	1.68398e-05
		N	119	119	119	119	119	119	119	119	119	119	119	119	119	119	119	119	119	119
	11. Generally, I think that the VR experience is helpful for my study of dental implant.	Correlation Coefficient	-0.0429097	.636**	.236**	.652**	.636**	.226*	.564**	.740**	.746**	.746**	.511**	1	.703**	.749**	.635**	.220*	.576**	.636**
		Sig. (2-tailed)	0.643105	7.48025e-15	0.00963126	9.53737e-16	7.58672e-15	0.0134022	2.36904e-11	7.09216e-22	2.27926e-22	1.96287e-22	2.88729e-09		5.35792e-19	1.18504e-22	8.33986e-15	0.0163447	7.31768e-12	7.70149e-15
		N	119	119	119	119	119	119	119	119	119	119	119	119	119	119	119	119	119	119
	12. Regarding to the content of this module, I think that the VR system should be combined with the traditionally practical approach.	Correlation Coefficient	0.0154529	.545**	.330**	.597**	.462**	0.160324	.445**	.685**	.718**	.642**	.253**	.703**	1	.797**	.586**	0.0980668	.479**	.699**
		Sig. (2-tailed)	0.867526	1.41412e-10	0.000243603	7.68466e-13	1.20944e-07	0.0815522	4.07568e-07	8.37844e-18	4.22099e-20	3.43367e-15	0.00551508	5.35792e-19		2.45871e-27	2.42669e-12	0.288667	3.665e-08	9.44094e-19
		N	119	119	119	119	119	119	119	119	119	119	119	119	119	119	119	119	119	119
	13. VR system is very suitable for implementing as an complimentary teaching approach in dental practical sessions.	Correlation Coefficient	-0.0370893	.512**	.198*	.655**	.538**	.222*	.472**	.766**	.798**	.692**	.434**	.749**	.797**	1	.659**	.281**	.617**	.778**
		Sig. (2-tailed)	0.688815	2.71967e-09	0.0310576	6.18183e-16	2.76292e-10	0.0154669	6.1839e-08	3.67675e-24	1.57233e-27	2.82151e-18	7.98036e-07	1.18504e-22	2.45871e-27		3.98501e-16	0.00200184	8.19203e-14	2.44168e-25
		N	119	119	119	119	119	119	119	119	119	119	119	119	119	119	119	119	119	119
	14. From my experience in utilizing VR system today, I think that the VR system appears to be a mature technology and supplies the real-word environment.	Correlation Coefficient	0.050312	.478**	0.173693	.586**	.600**	.281**	.543**	.592**	.544**	.577**	.614**	.635**	.586**	.659**	1	.406**	.594**	.603**
		Sig. (2-tailed)	0.586861	3.76135e-08	0.0588711	2.48657e-12	5.26229e-13	0.00197475	1.69994e-10	1.39435e-12	1.59093e-10	6.23985e-12	1.16161e-13	8.33986e-15	2.42669e-12	3.98501e-16		4.5743e-06	1.11568e-12	3.81726e-13
		N	119	119	119	119	119	119	119	119	119	119	119	119	119	119	119	119	119	119
	15. I think that the traditional practical teaching in dental education would be replaced by VR system in the future.	Correlation Coefficient	0.0880279	.181*	0.0111777	0.180038	.355**	.254**	.277**	.220*	.182*	.260**	.464**	.220*	0.0980668	.281**	.406**	1	.675**	.246**
		Sig. (2-tailed)	0.341105	0.0488678	0.903968	0.0500782	7.5353e-05	0.00522984	0.00231197	0.0160329	0.047147	0.0043518	1.05182e-07	0.0163447	0.288667	0.00200184	4.5743e-06		4.05073e-17	0.00693161
		N	119	119	119	119	119	119	119	119	119	119	119	119	119	119	119	119	119	119
	16. I would like to spend more time studying dental courses using VR system.	Correlation Coefficient	0.175799	.421**	0.170979	.526**	.543**	.267**	.507**	.537**	.525**	.572**	.503**	.576**	.479**	.617**	.594**	.675**	1	.615**
		Sig. (2-tailed)	0.0558228	1.85653e-06	0.0630005	7.95308e-10	1.77215e-10	0.00335386	4.07719e-09	3.06454e-10	8.86843e-10	1.07614e-11	5.48683e-09	7.31768e-12	3.665e-08	8.19203e-14	1.11568e-12	4.05073e-17		1.02004e-13
		N	119	119	119	119	119	119	119	119	119	119	119	119	119	119	119	119	119	119
	17. After experiencing VR system, I expect that VR system is utilized by other scientific disciplines in teaching and learning.	Correlation Coefficient	-0.00134003	.436**	0.177395	.607**	.501**	.203*	.539**	.693**	.614**	.605**	.383**	.636**	.699**	.778**	.603**	.246**	.615**	1
		Sig. (2-tailed)	0.98846	7.29675e-07	0.0535997	2.43034e-13	6.60747e-09	0.0266383	2.50599e-10	2.5425e-18	1.16925e-13	3.07467e-13	1.68398e-05	7.70149e-15	9.44094e-19	2.44168e-25	3.81726e-13	0.00693161	1.02004e-13
		N	119	119	119	119	119	119	119	119	119	119	119	119	119	119	119	119	119	119
**. Correlation is significant at the 0.01 level (2-tailed).
*. Correlation is significant at the 0.05 level (2-tailed).

## Sheet: 8. Kruskal-Wallis (Table 3)
gender	experienced	item1	item2	item3	item4	item5	item6	item7	item8	item9	item10	item11	item12	item13	item14	item15	item16	item17
1	2	3	4	4	5	8	6	5	5	5	9	5	5	5	7	10	6	4
1	2	9	7	9	9	3	6	9	9	9	7	10	9	9	6	6	7	6
1	2	10	2	2	7	7	7	4	5	5	8	7	2	2	4	5	3	2
1	1	4	3	3	5	5	3	3	3	3	7	5	3	5	7	7	5	3
1	2	6	7	4	6	5	5	5	5	5	5	5	4	5	3	9	5	3
1	2	3	5	3	3	4	6	3	3	3	3	2	4	4	5	6	4	3
1	2	2	6	2	2	7	2	2	2	2	2	2	2	2	4	4	4	4
1	2	3	3	2	2	6	3	3	3	3	7	3	2	3	4	5	3	3
1	1	9	9	9	9	9	9	9	9	9	9	9	9	9	9	9	9	9
1	1	9	9	9	9	9	9	9	9	9	9	9	9	9	9	9	9	9
1	1	4	7	5	7	10	8	3	4	5	5	4	3	3	4	7	6	4
1	2	2	4	2	9	7	5	2	3	7	6	5	3	2	6	10	5	2
1	1	3	3	2	2	3	2	3	2	4	6	2	2	2	4	6	2	2
1	1	2	2	2	9	10	4	5	2	5	10	3	2	5	10	10	8	6
1	2	3	8	4	6	4	7	3	3	3	7	4	4	2	5	3	3	4
1	2	3	2	3	3	2	3	2	2	4	3	3	2	2	2	4	4	3
1	2	4	7	3	5	5	4	5	4	3	7	5	2	3	4	7	5	3
1	1	3	8	3	3	3	4	4	3	3	3	3	4	2	4	5	3	3
1	2	2	8	5	9	10	7	3	5	4	10	3	3	5	4	10	6	4
1	2	2	5	5	4	6	3	5	4	4	5	4	5	4	8	4	4	5
1	2	3	4	3	2	3	2	3	3	3	3	3	2	2	2	7	3	2
1	1	5	5	6	5	6	6	5	5	5	5	4	4	4	3	4	4	4
1	2	10	7	10	7	2	9	10	10	9	2	10	10	10	8	2	5	10
1	1	2	3	2	4	2	3	2	2	3	2	4	3	3	2	4	4	3
1	2	5	7	5	6	8	8	4	3	6	6	6	3	3	6	6	6	4
1	2	3	5	4	4	9	4	3	3	3	6	4	5	5	5	5	4	4
1	2	4	6	8	8	7	2	2	2	2	7	4	3	2	4	5	4	2
1	2	5	5	5	5	6	5	5	5	5	5	5	5	5	5	5	5	6
1	1	3	5	4	4	3	5	3	4	3	4	4	3	4	3	4	3	4
1	1	5	9	5	5	7	6	2	2	4	9	3	2	2	6	8	4	2
1	1	2	4	3	2	3	3	2	2	2	4	3	2	2	3	7	5	4
1	1	4	4	8	4	8	4	4	4	4	6	4	3	5	4	7	7	5
1	2	4	4	5	4	7	6	4	4	4	5	3	4	4	5	6	6	5
1	2	6	4	6	8	7	4	6	6	6	6	6	6	6	6	6	6	5
1	1	5	5	5	4	4	4	4	5	5	5	5	6	5	5	4	4	6
1	1	3	3	5	4	5	10	3	2	5	9	5	2	2	8	5	4	3
1	1	4	4	7	5	7	5	5	6	5	8	7	2	4	5	5	6	2
1	1	3	6	4	3	3	3	3	3	3	3	3	3	3	3	4	3	3
2	2	7	5	2	4	2	2	2	4	4	6	4	2	2	2	7	7	2
2	1	2	3	2	3	2	2	2	2	2	2	2	2	2	2	8	2	2
2	1	3	8	2	3	8	8	4	4	4	7	3	3	3	3	8	7	4
2	2	4	4	2	7	10	6	2	2	2	2	2	2	2	8	8	4	2
2	2	2	4	2	4	10	7	4	4	4	4	4	2	2	3	4	3	3
2	2	10	10	10	10	10	10	10	10	10	10	10	10	10	10	10	10	10
2	2	2	2	2	2	2	2	2	2	2	2	2	2	2	2	2	2	2
2	1	10	10	10	10	9	10	10	10	10	7	9	10	10	10	6	8	8
2	2	4	8	4	6	9	4	4	5	6	5	6	5	5	5	8	6	4
2	2	2	7	4	4	10	5	2	2	3	7	4	2	3	4	10	6	3
2	1	2	2	2	2	2	2	2	2	2	2	2	2	2	2	2	2	2
2	1	4	7	5	5	5	8	3	2	3	3	3	2	2	5	6	4	4
2	1	4	6	2	2	10	3	2	2	2	4	4	4	4	6	9	7	4
2	2	3	4	2	2	7	2	2	2	2	2	2	2	2	2	4	2	2
2	2	8	5	7	8	8	8	8	8	8	7	8	9	9	8	8	8	8
2	1	9	9	8	9	9	8	9	10	10	9	9	9	9	9	10	9	10
2	2	2	2	2	6	7	8	3	2	2	2	2	2	2	2	5	4	2
2	2	3	4	2	7	10	10	7	2	2	3	4	3	3	4	9	7	7
2	1	8	6	8	8	6	8	8	8	8	8	8	8	8	8	8	9	9
2	1	4	6	4	4	4	8	3	3	4	5	4	3	4	7	6	7	7
2	2	9	9	9	9	9	9	9	9	9	8	9	10	10	9	8	9	9
2	2	2	9	2	4	10	4	2	3	4	2	3	3	2	2	3	4	2
2	1	2	3	2	3	10	2	2	3	2	3	2	3	2	3	2	2	2
2	1	8	9	5	5	5	5	4	4	4	4	4	4	4	4	5	4	4
2	2	2	6	2	3	8	5	4	5	5	5	4	3	3	5	7	5	4
2	2	2	5	4	4	4	5	6	5	6	6	5	5	5	5	6	6	5
2	1	4	6	7	8	9	8	4	3	5	8	5	4	2	5	9	8	2
2	1	4	5	5	5	4	4	3	3	4	4	3	3	3	5	5	5	4
2	2	3	5	7	6	5	2	2	2	2	4	5	4	4	6	4	4	2
2	1	7	8	3	5	6	7	4	5	3	5	6	8	7	9	7	4	3
2	1	4	10	2	5	7	6	3	4	3	4	4	3	3	9	10	9	2
2	2	5	8	4	3	3	6	4	4	3	5	4	2	3	3	6	5	2
2	2	4	9	2	4	9	4	2	2	2	3	4	2	2	2	4	4	4
2	2	10	8	7	8	6	8	8	9	9	10	10	10	10	10	6	6	9
2	1	7	9	4	2	4	5	3	3	5	2	2	3	2	3	2	4	2
2	2	3	9	4	4	10	2	2	2	2	9	2	2	2	3	3	2	2
2	2	4	9	3	2	7	3	2	2	2	2	2	3	2	2	9	7	3
2	1	3	7	3	3	8	3	3	3	3	3	3	3	3	3	3	3	3
2	1	7	8	4	5	10	4	6	4	4	5	5	4	3	5	4	3	3
2	2	3	5	4	4	10	6	2	2	2	4	2	2	2	3	4	4	2
2	1	4	10	2	2	2	3	2	2	2	2	2	3	2	2	8	3	2
2	2	5	5	10	9	9	9	5	5	5	10	3	3	3	9	10	5	7
2	2	6	10	7	9	7	9	5	4	6	9	7	4	5	7	9	8	6
2	1	2	3	3	3	7	4	2	2	3	2	4	5	4	5	6	6	5
2	1	2	4	3	5	7	5	3	2	2	7	3	2	3	4	8	5	5
2	1	3	7	5	7	2	7	2	2	2	7	2	2	2	7	7	7	4
2	1	8	8	4	8	8	8	3	3	3	3	3	2	2	2	2	2	2
2	2	7	5	6	8	10	7	5	5	5	6	5	5	4	10	9	8	4
2	2	5	8	4	8	10	9	10	10	9	6	7	9	7	9	8	8	6
2	1	5	9	6	5	8	9	7	5	7	7	7	7	5	5	5	7	7
2	2	2	7	5	5	5	4	5	6	3	5	4	4	4	9	4	5	5
2	1	4	6	4	6	8	4	3	3	4	4	3	2	3	3	6	4	4
2	1	3	7	3	3	2	2	3	3	3	3	3	3	2	2	2	5	2
2	1	4	6	2	2	7	9	7	2	4	3	5	3	2	4	2	2	3
2	1	3	9	5	8	2	4	2	2	3	6	3	2	2	2	4	3	2
2	1	3	9	2	2	4	2	2	2	2	7	2	2	2	7	3	3	2
2	1	2	8	2	6	10	6	2	2	2	2	2	2	2	2	2	2	2
2	1	5	7	5	5	10	5	2	2	2	8	5	3	3	6	6	5	3
2	1	8	8	5	5	8	6	5	5	5	5	4	5	5	7	8	5	5
2	1	3	4	4	5	10	3	3	3	3	6	4	3	3	7	8	5	3
2	2	2	3	2	3	3	2	2	2	2	4	2	2	2	2	7	5	4
2	1	5	8	5	7	7	7	8	7	7	5	5	2	4	5	10	10	3
2	1	6	7	4	5	6	6	2	2	2	10	5	2	2	6	10	5	4
2	1	10	8	8	8	4	9	9	9	9	10	9	9	9	9	6	9	9
2	2	2	5	5	4	10	8	5	4	4	9	3	2	4	5	10	5	2
2	1	5	5	7	8	6	7	5	6	6	10	7	4	7	7	10	10	8
2	2	4	10	2	3	5	7	4	3	3	3	3	5	3	3	3	3	3
2	2	5	6	5	5	6	6	5	5	6	4	5	5	4	5	6	6	5
2	1	2	6	7	5	10	5	5	4	4	4	6	3	4	5	6	6	5
2	1	5	5	8	8	8	9	5	5	6	9	5	5	6	8	6	8	5
2	1	2	3	2	3	3	2	2	2	2	4	2	2	2	2	7	5	4
2	2	5	8	5	7	7	7	8	7	7	5	5	2	4	5	10	10	3
2	1	6	7	4	5	6	6	2	2	2	10	5	2	2	6	10	5	4
2	1	10	8	8	8	4	9	9	9	9	10	9	9	9	9	6	9	9
2	1	2	5	5	4	10	8	5	4	4	9	3	2	4	5	10	5	2
2	1	5	5	7	8	6	7	5	6	6	10	7	4	7	7	10	10	8
2	1	4	10	2	3	5	7	4	3	3	3	3	5	3	3	3	3	3
2	1	5	6	5	5	6	6	5	5	6	4	5	5	4	5	6	6	5
2	1	2	6	7	5	10	5	5	4	4	4	6	3	4	5	6	6	5
2	1	5	5	8	8	8	9	5	5	6	9	5	5	6	8	6	8	5
2	1	10	8	10	7	5	8	10	10	8	10	8	9	8	7	4	5	8
gender
																			gender				experience
Test Statisticsa,b																				Kruskal-Wallis H	df	Asymp. Sig.		Kruskal-Wallis H	df	Asymp. Sig.
	item1	item2	item3	item4	item5	item6	item7	item8	item9	item10	item11	item12	item13	item14	item15	item16	item17		item1	0.42	1	0.517		0.837	1	0.36
Kruskal-Wallis H	0.42	9.581	0.151	0.026	4.486	2.947	0.001	0.125	1.32	0.766	0.342	0.017	0.375	0.038	0.576	2.348	0.007		item2	9.581	1	0.002		1.077	1	0.299
df	1	1	1	1	1	1	1	1	1	1	1	1	1	1	1	1	1		item3	0.151	1	0.698		0.984	1	0.321
Asymp. Sig.	0.517	0.002	0.698	0.872	0.034	0.086	0.972	0.724	0.251	0.381	0.559	0.897	0.54	0.845	0.448	0.125	0.935		item4	0.026	1	0.872		0.219	1	0.64
a Kruskal Wallis Test																			item5	4.486	1	0.034		1.192	1	0.275
b Grouping Variable: VAR00001																			item6	2.947	1	0.086		0.262	1	0.609
																			item7	0.001	1	0.972		0.088	1	0.766
																			item8	0.125	1	0.724		0.752	1	0.386
																			item9	1.32	1	0.251		0.037	1	0.847
experience																			item10	0.766	1	0.381		0.364	1	0.546
																			item11	0.342	1	0.559		0	1	0.985
Test Statisticsa,b																			item12	0.017	1	0.897		0.021	1	0.884
	item1	item2	item3	item4	item5	item6	item7	item8	item9	item10	item11	item12	item13	item14	item15	item16	item17		item13	0.375	1	0.54		0.009	1	0.926
Kruskal-Wallis H	0.837	1.077	0.984	0.219	1.192	0.262	0.088	0.752	0.037	0.364	0	0.021	0.009	0.427	0.053	0.06	0.225		item14	0.038	1	0.845		0.427	1	0.514
df	1	1	1	1	1	1	1	1	1	1	1	1	1	1	1	1	1		item15	0.576	1	0.448		0.053	1	0.819
Asymp. Sig.	0.36	0.299	0.321	0.64	0.275	0.609	0.766	0.386	0.847	0.546	0.985	0.884	0.926	0.514	0.819	0.806	0.636		item16	2.348	1	0.125		0.06	1	0.806
a Kruskal Wallis Test																			item17	0.007	1	0.935		0.225	1	0.636
b Grouping Variable: VAR00002
																			Table 3
Group Statistics
gender						experience														Kruskal-Wallis H	Asymp. Sig.	Kruskal-Wallis H	Asymp. Sig.
Ranks						Ranks													item1	0.42	0.517	0.837	0.36
	VAR00001	N	Mean Rank				VAR00002	N	Mean Rank										item2	9.581	0.002	1.077	0.299
item1	1	38	57.05			item1	1	66	62.55										item3	0.151	0.698	0.984	0.321
	2	81	61.38				2	53	56.82										item4	0.026	0.872	0.219	0.64
	Total	119					Total	119											item5	4.486	0.034	1.192	0.275
item2	1	38	45.83			item2	1	66	62.92										item6	2.947	0.086	0.262	0.609
	2	81	66.65				2	53	56.37										item7	0.001	0.972	0.088	0.766
	Total	119					Total	119											item8	0.125	0.724	0.752	0.386
item3	1	38	61.76			item3	1	66	62.77										item9	1.32	0.251	0.037	0.847
	2	81	59.17				2	53	56.56										item10	0.766	0.381	0.364	0.546
	Total	119					Total	119											item11	0.342	0.559	0	0.985
item4	1	38	59.26			item4	1	66	58.69										item12	0.017	0.897	0.021	0.884
	2	81	60.35				2	53	61.63										item13	0.375	0.54	0.009	0.926
	Total	119					Total	119											item14	0.038	0.845	0.427	0.514
item5	1	38	50.3			item5	1	66	56.93										item15	0.576	0.448	0.053	0.819
	2	81	64.55				2	53	63.82										item16	2.348	0.125	0.06	0.806
	Total	119					Total	119											item17	0.007	0.935	0.225	0.636
item6	1	38	52.13			item6	1	66	61.44
	2	81	63.69				2	53	58.21
	Total	119					Total	119
item7	1	38	60.16			item7	1	66	59.17
	2	81	59.93				2	53	61.03
	Total	119					Total	119
item8	1	38	61.59			item8	1	66	57.6
	2	81	59.25				2	53	62.99
	Total	119					Total	119
item9	1	38	65.22			item9	1	66	59.46
	2	81	57.55				2	53	60.67
	Total	119					Total	119
item10	1	38	64.01			item10	1	66	61.7
	2	81	58.12				2	53	57.89
	Total	119					Total	119
item11	1	38	62.66			item11	1	66	59.95
	2	81	58.75				2	53	60.07
	Total	119					Total	119
item12	1	38	60.58			item12	1	66	59.6
	2	81	59.73				2	53	60.5
	Total	119					Total	119
item13	1	38	62.75			item13	1	66	60.26
	2	81	58.71				2	53	59.68
	Total	119					Total	119
item14	1	38	59.11			item14	1	66	61.83
	2	81	60.42				2	53	57.72
	Total	119					Total	119
item15	1	38	56.53			item15	1	66	59.36
	2	81	61.63				2	53	60.8
	Total	119					Total	119
item16	1	38	53			item16	1	66	60.69
	2	81	63.28				2	53	59.14
	Total	119					Total	119
item17	1	38	60.37			item17	1	66	61.32
	2	81	59.83				2	53	58.36
	Total	119					Total	119
